# Supplementary material for: Enhancing the thermoelectric performance of a Ti2FeNiSb2 double half-Heusler alloy through excess Ni-induced full-Heusler nanoprecipitates
Source: Royal Society of Chemistry journal article supplement (doi:10.1039/d3qi01132a), 2023-01-01
Supplement: d3qi01132a1.pdf [file d3qi01132a1.pdf]

## **Enhancing thermoelectric performance of $\text{Ti}_2\text{FeNiSb}_2$ double half-Heusler alloy through excess Ni-induced full-Heusler nanoprecipitates**

Rahidul Hasan<sup>a†</sup>, Yan Gu<sup>a†</sup>, Se Yun Kim<sup>b†</sup>, Dong Won Chun<sup>a,c,d\*</sup>, Kyu Hyung Lee<sup>a,d\*</sup>

<sup>a</sup>Department of Materials Science and Engineering, Yonsei University, Seoul 03722, Republic of Korea

<sup>b</sup>Samsung Electronics, Suwon 16678, Republic of Korea

<sup>c</sup>Energy Materials Research Center, Korea Institute of Science and Technology, Seoul 02792, Republic of Korea

<sup>d</sup>Yonsei-KIST Convergence Research Institute

<sup>†</sup>These authors equally contributed this work.

E-mail: chundream98@kist.re.kr(D.W.C.), khlee2018@yonsei.ac.kr(K.H.L.)

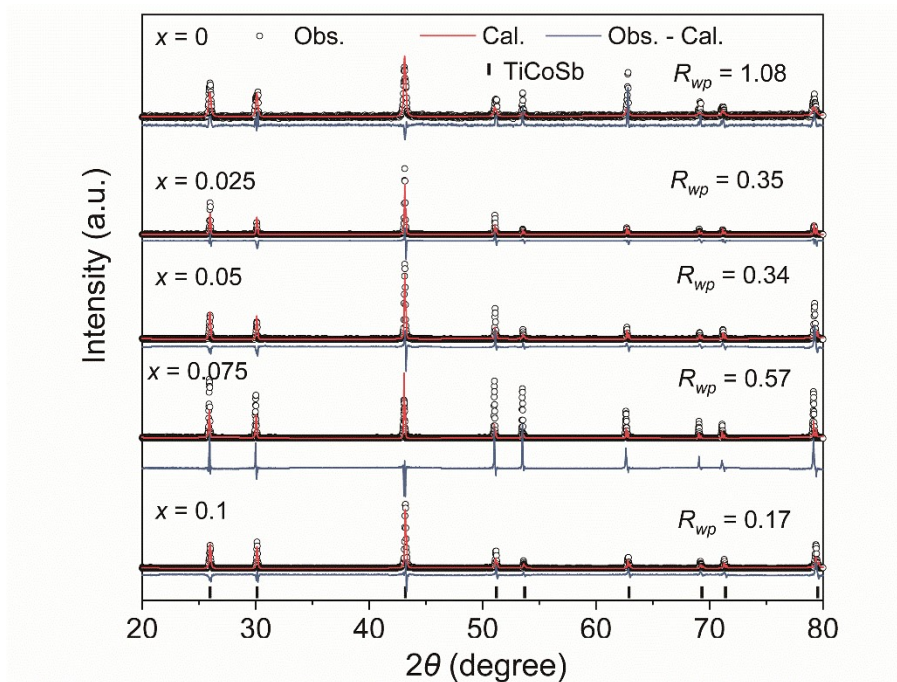

Fig. S1. Rietveld Refinement of XRD patterns for  $\text{Ti}_2\text{Ni}_{1+x}\text{FeSb}_2$  ( $x = 0$  to  $0.1$ ) samples based on  $\text{TiCoSb}$  phase using Profex software package.

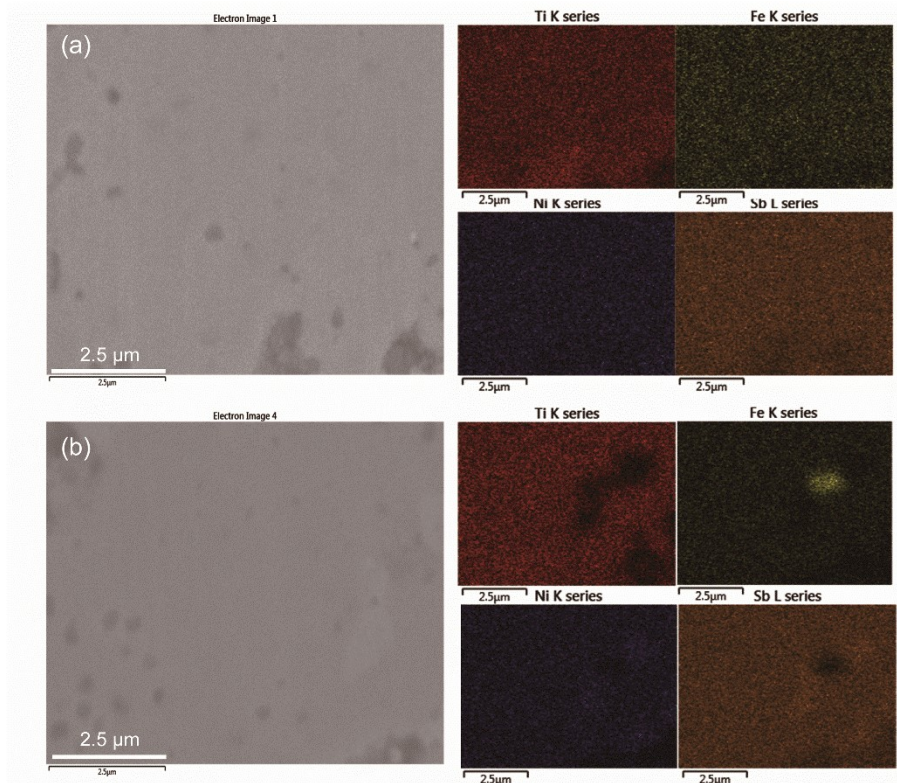

Fig. S2. SEM images and EDS mapping for (a)  $\text{Ti}_2\text{Ni}_{1.05}\text{FeSb}_2$  and (b)  $\text{Ti}_2\text{Ni}_{1.1}\text{FeSb}_2$  samples.

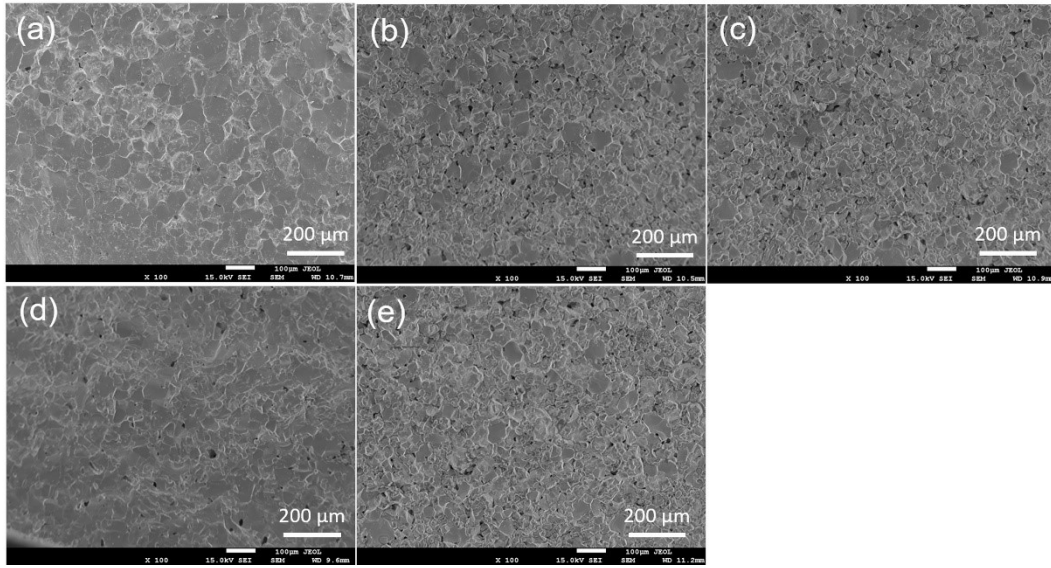

Fig. S3. SEM image for the unpolished fracture structure of (a)  $\text{Ti}_2\text{FeNiSb}_2$  prepared by spark plasma sintering, (b)  $\text{Ti}_2\text{FeNi}_{1.025}\text{Sb}_2$ , (c)  $\text{Ti}_2\text{FeNi}_{1.05}\text{Sb}_2$ , (d)  $\text{Ti}_2\text{FeNi}_{1.075}\text{Sb}_2$  and (e)  $\text{Ti}_2\text{FeNi}_{1.1}\text{Sb}_2$  prepared by cold isostatic pressure.

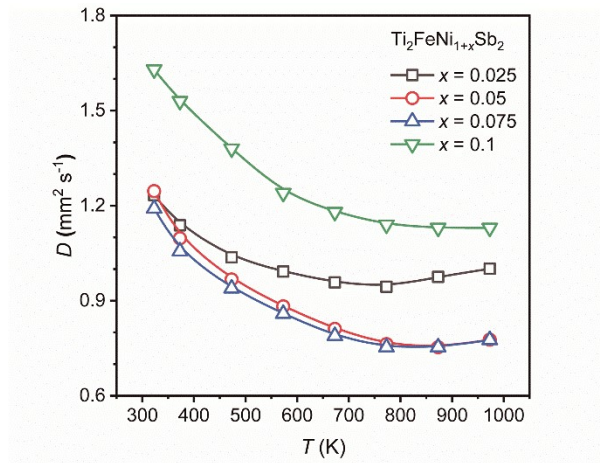

Fig. S4. Temperature dependent thermal diffusivity for  $\text{Ti}_2\text{FeNi}_{1+x}\text{Sb}_2$  ( $x = 0.025, 0.05, 0.075$  and  $0.1$ ) samples.
